# Supplementary material for: Thirty-One Novel Biomarkers as Predictors for Clinically Incident Diabetes
Source: PLoS One. 2010 Apr 9;5(4):e10100. doi: 10.1371/journal.pone.0010100 (PMC2852424; doi:10.1371/journal.pone.0010100)
Supplement: Table S5 — Gender-specific net reclassification improvement (NRI) due to the biomarker score. Coefficients from FINRISK97 are applied to the Health 2000 validation cohort. (0.06 MB DOC) [file pone.0010100.s006.doc]

| **Predicted risk without biomarker score** | **Predicted risk with biomarker score** | | | | | |
| --- | --- | --- | --- | --- | --- | --- |
| Men* developing diabetes during 7-year follow-up (n=94) | <3% | 3-7.9% | 8-14.9% | ≥ 15% | up‡ | down‡ |
| <3% | 16 (78.5%) | 4 (21.5%) | 0 (0.0%) | 0 (0.0%) |  |  |
| 3-7.9 % | 5 (14.2%) | 18 (47.7%) | 12 (31.8%) | 2 (6.4%) | 30 (29.4%) | 10 (9.6%) |
| 8-14.9% | 0 (0.0%) | 2 (10.7%) | 6 (32.9%) | 11 (56.5%) |  |  |
| ≥ 15% | 0 (0.0%) | 1 (4.6%) | 1 (4.0%) | 24 (91.4%) |  |  |
|  |  |  |  |  |  |  |
| Men* not developing diabetes during 7-year follow-up (n=2197) | | | | | | |
| <3% | 1223 (91.7%) | 107 (8.0%) | 3 (0.2%) | 1 (0.1%) |  |  |
| 3-7.9 % | 223 (38.9%) | 271 (47.4%) | 63 (11.1%) | 15 (2.6%) | 226 (10.4%) | 348 (16.0%) |
| 8-14.9% | 15 (8.1%) | 76 (40.8%) | 58 (30.9%) | 38 (20.3%) |  |  |
| ≥ 15% | 2 (2.6%) | 12 (15.1%) | 21 (26.8%) | 43 (55.5%) |  |  |
|  |  |  |  |  |  |  |
| Women† developing diabetes during 7-year follow-up (n=80) | | | | | | |
| <3% | 13 (61.5%) | 8 (38.5%) | 0 (0.0%) | 0 (0.0%) |  |  |
| 3-7.9 % | 4 (13.7%) | 22 (69.8%) | 3 (10.0%) | 2 (6.5%) | 20 (23.9%) | 10 (12.5%) |
| 8-14.9% | 1 (5.4%) | 3 (16.1%) | 8 (41.8%) | 7 (36.7%) |  |  |
| ≥ 15% | 0 (0.0%) | 0 (0.0%) | 2 (15.3%) | 12 (84.7%) |  |  |
|  |  |  |  |  |  |  |
| Women† not developing diabetes during 7-year follow-up (n=2694) | | | | | | |
| <3% | 1791 (95.7%) | 78 (4.2%) | 2 (0.1%) | 0 (0.0%) |  |  |
| 3-7.9 % | 166 (29.9%) | 327 (59.1%) | 57 (10.3%) | 4 (0.7%) | 164 (6.3%) | 222 (8.5%) |
| 8-14.9% | 2 (1.6%) | 37 (29.3%) | 64 (50.8%) | 23 (18.3%) |  |  |
| ≥ 15% | 1 (1.5%) | 5 (7.4%) | 11 (16.0%) | 51 (75.2%) |  |  |

**Supporting Table S5: Gender-specific net reclassification improvement (NRI) due to the biomarker score.** Coefficients from FINRISK97 are applied to the Health 2000 validation cohort.

*For men, the best biomarker score consisted of a linear combination of adiponectin, apoB, IL-1ra and ferritin. The NRI was 25.4% (SE 0.064), p<0.0001. The conventional risk factor model included the same risk factors as in Fig. 1.

† For women, the best biomarker score consisted of a liner combination of adiponectin, apoB, CRP and insulin. The NRI was 13.6% (SE 0.067), p=0.041. The conventional risk factor model included the same risk factors as in Fig. 1.

‡The numbers of persons reclassified up and down do not exactly equal to the sum of different categories, because the reclassification analysis has been performed using the Kaplan-Meier approach [8],[9] and the result has been rounded to the nearest integer.
